# Supplementary material for: The circular RNA Edis regulates neurodevelopment and innate immunity
Source: PLoS Genet. 2022 Oct 27;18(10):e1010429. doi: 10.1371/journal.pgen.1010429 (PMC9612488; doi:10.1371/journal.pgen.1010429)
Supplement: S2 Table — (XLSX) [file pgen.1010429.s021.xlsx]

## Sheet: Ashwal
Table S2. Comparison of candidate circRNA dataset with previous published datasets
	match	same chromosome, same start and end position, and same strand
	3P or 5P	same chromosome, either same start or end position, and same strand
		Input A	Input B	Output	%
		TableS1.bed	2014_Ashwal-Fluss_MolCell_circRNA-TableS1_S2.bed
		4990	975	440	0.451282
	match		975	440	0.451282
	3P or 5P		975	123	0.126154
	match	4990		440	0.0881764
	3P or 5P	4990		253	0.0507014
The Ashwal-Fluss data were derived from Supplementary Table S1 (fly head and S2 cells). There are 975 circRNAs detected in the S2 cells. These circRNAs were used for the comparison with our data because our circRNAs (Table S1, 4990 circRNAs) were also identified from S2 cells. We consider that circRNAs are identical to each other if they share the same chromosome, start and end positions, as well…

## Sheet: Westholm
	C4_20EML_circ_001705
	match	same chromosome, same start and end position, and same strand
	3P or 5P	same chromosome, either same start or end position, and same strand
		Input A	Input B	Output	%
		TableS1.bed	2014_Westholm_CellRep_circRNA-TableS2.bed
		4990	2513
	match		2513	762	0.303223
	3P or 5P		2513	332	0.132113
	match	4990		762	0.152705
	3P or 5P	4990		260	0.0521042
Westholm circRNAs were generated by mining public fly RNA-seq data. There are no exact matched start positions between Westholm’s data and ours. However, if we consider +2/-2 of start position as overlap (AG/GT), there are 762 circRNAs (including C4_20MEL_circ_001705) sharing the same chromosome, start and end positions, as well as strands between these two datasets (30.32% (762/2513) for Westhol…
